1 Weakest link dynamics predict apparent antibiotic interactions  
2 in a model cross-feeding community

3 Elizabeth M. Adamowicz<sup>a</sup>, William R. Harcombe<sup>b,c,1</sup>

4 *<sup>a</sup>Department of Genetics, Cell Biology, and Development, University of Minnesota, Minneapolis,*  
5 *MN 55414;*

6 *<sup>b</sup>Department of Ecology, Evolution and Behavior, University of Minnesota, St. Paul, MN 55108;*

7 *<sup>c</sup>BioTechnology Institute, University of Minnesota, St. Paul, MN 55108;*

8 *<sup>1</sup>To whom correspondence may be addressed. Email: [harcombe@umn.edu](mailto:harcombe@umn.edu)*

9 Author contributions: E.M.A. and W.R.H. designed research; E.M.A. performed research;  
10 E.M.A. analyzed data; and E.M.A. and W.R.H. wrote the paper.

11

12 Keywords: Synergy, antagonism, combination therapy, polymicrobial, antibiotic resistance

13 **Abstract**

14 With the growing global threat of antimicrobial resistance, novel strategies are required for  
15 combatting resistant pathogens. Combination therapy, wherein multiple drugs are used to treat an  
16 infection, has proven highly successful in the treatment of cancer and HIV. However, this  
17 practice has proven challenging for the treatment of bacterial infections due to difficulties in  
18 selecting the correct combinations and dosages. An additional challenge in infection treatment is  
19 the polymicrobial nature of many infections, which may respond to antibiotics differently than a  
20 monoculture pathogen. This study tests whether patterns of antibiotic interactions (synergy,  
21 antagonism, or independence/additivity) in monoculture can be used to predict antibiotic  
22 interactions in an obligate cross-feeding co-culture. Using our previously described weakest link  
23 hypothesis, we hypothesized antibiotic interactions in co-culture based on the interactions we  
24 observed in monoculture. We then compared our predictions to observed antibiotic interactions  
25 in co-culture. We tested the interactions between ten previously identified antibiotic  
26 combinations using checkerboard assays. Although our antibiotic combinations interacted  
27 differently than predicted in our monocultures, our monoculture results were generally sufficient  
28 to predict co-culture patterns based solely on the weakest link hypothesis. These results suggest  
29 that combination therapy for cross-feeding multispecies infections may be successfully designed  
30 based on antibiotic interaction patterns for their component species.

31

32

### 33 **Introduction**

34 Antibiotic resistance is a growing global threat. It is estimated that, by 2050, 10 million deaths  
35 per year worldwide will be attributable to antibiotic-resistant infections (1). Many previously  
36 treatable infections, such as tuberculosis (2), urinary tract infections (3), and even  
37 *Staphylococcus*-mediated skin infections (4) now require higher doses of more powerful  
38 antibiotics. More concerning is that the patients most at risk for multidrug resistant infections are  
39 those with complex medical histories and increased risk of side effects (5). This arms race  
40 against pathogens by clinicians is proving a losing battle, as resistance is acquired rapidly, and  
41 the development of novel antimicrobials is limited (6, 7). The demand for novel treatment  
42 strategies is, therefore, an ever-increasing issue.

43 One treatment strategy that has proven particularly successful is the use of drug combinations.  
44 The best example of this is perhaps for antivirals against HIV, where the advent of highly active  
45 antiretroviral therapy (HAART) dramatically improved the longevity and quality of life for HIV  
46 patients (8). The theory behind this treatment is based on simple probability — even in a highly  
47 mutable and therefore rapid resistance-acquiring virus such as HIV, it is much less likely that a  
48 viral population will acquire resistance to multiple antivirals than a single one, assuming an  
49 independent mutation is required for resistance to each drug (8, 9). This approach, of using  
50 multiple drugs to target multiple essential targets, has also been used in cancer chemotherapy to  
51 manage drug-resistant and genetically heterogeneous tumors (10, 11). In cases of bacterial  
52 infections, multidrug therapy has been adopted in only a few specific infections, such as  
53 treatment for drug sensitive tuberculosis (2). However, clinical trials of combination therapy in  
54 the treatment of bacterial infections in patients have been limited. Choosing the correct drug  
55 combination is difficult (12, 13), and efficacy has been mixed (14, 15). A greater understanding

56 of the mechanisms driving effective combination therapy are therefore required for successful  
57 clinical implementation.

58 The success of combination therapy is affected by interactions between drugs, wherein the  
59 activity and effectiveness of one drug is impacted by the presence or absence of another (16).

60 There are several mechanisms by which antibiotics may synergize (work more effectively or at  
61 lower doses together than separately) or antagonize (work less effectively or at higher doses  
62 together than separately). While the precise nature of these interactions depends on the drugs and  
63 the bacterial species being targeted, some general mechanisms have been described for different  
64 classes of antibiotics (17). Synergistic interactions tend to occur when one drug facilitates  
65 cellular entry (18–20) or increased efficacy (21) of another, or when the drugs target similar  
66 cellular processes (22, 23). Conversely, antagonism may occur when one antibiotic induces  
67 tolerance or resistance to another (17, 24, 25), or when one drug corrects for the physiological  
68 disruptions caused by another (26). These are general trends only, however, and many species–  
69 and drug – specific exceptions apply, making it challenging to predict drug interactions *a priori*  
70 in new systems.

71 Another increasingly appreciated feature of bacterial infections is their polymicrobial nature.

72 Numerous clinically relevant infections are now known to involve multiple species, consisting of  
73 a single pathogen and various commensal partners, or several co-infecting pathogens (27, 28).

74 Polymicrobial infections have been observed to have worse clinical outcomes in some cases (29–  
75 31), though these results are mixed (32, 33). The metabolic interactions (both positive and  
76 negative) among these species have been demonstrated to impact antibiotic response (34). One  
77 such positive interaction is cross-feeding, wherein one species produces an essential metabolite  
78 for another; this also occurs in infection contexts (35). For example, in a cystic fibrosis model

79 where the pathogen *Pseudomonas aeruginosa* depends on the mucin degradation products  
80 supplied by a community of anaerobic commensals, antibiotics specifically targeting the  
81 anaerobes decreased *P. aeruginosa* abundance despite its intrinsic resistance to the antibiotic  
82 (36). Treatment regimens might, therefore, be more effective if metabolic interactions among  
83 species are taken into account; however, little research has been done on how cross-feeding  
84 might impact combination therapy.

85 To this end, we aimed to test whether cross-feeding interactions in a model bacterial community  
86 might influence antibiotic interactions. We selected ten combinations of six antibiotics based on  
87 the work of Yeh et al. (16); this study quantitatively tested the pairwise interactions between 21  
88 different antibiotics which altered *E. coli* growth rate. Three of the combinations we selected  
89 from this study were predicted to synergize (greater antibiotic efficacy in combination than  
90 alone); three were predicted to antagonize (lower antibiotic efficacy in combination than alone),  
91 and four to interact additively or independently in *E. coli* monoculture. Our model system,  
92 consisting of an *E. coli* methionine auxotroph strain that produces acetate from lactose, and an *S.*  
93 *enterica* that produces methionine, has been previously described (36–38). We first tested each of  
94 these combinations for their drug interactions in *E. coli* and *S. enterica* monoculture, and used  
95 fractional inhibitory concentration indices (FICIs) to identify any drug interactions. We then  
96 used our “weakest link” hypothesis to predict the growth patterns of the co-culture and the  
97 subsequent antibiotic interactions. Briefly, the weakest link hypothesis states that the “weakest  
98 link” species in an obligate cross-feeding community will define the tolerance (i.e. the ability to  
99 grow at high antibiotic concentrations) of the entire community. In this study, we found that only  
100 three antibiotic combinations showed non-additive interactions; however, weakest link dynamics  
101 successfully predicted co-culture growth and antibiotic interactions in these cases. While more

102 antibiotic combinations need to be explored, these results suggest that the responses of individual  
103 community members to combination therapy might be sufficient to predict the antibiotic  
104 interactions in the larger microbial community.

105

## 106 **Results**

107 Based on previous results in *E. coli* (16), we tested ten combinations of six antibiotics for  
108 synergy or antagonism in *E. coli* and *S. enterica* monocultures (**Table 1**). The mechanism of  
109 action for each of these antibiotics can be found in **Supplementary table S1**. Each combination  
110 was tested in triplicate and minimum inhibitory concentrations (MICs), fractional inhibitory  
111 concentrations (FICs) and fractional inhibitory concentration indices (FICIs) were obtained after  
112 48 hours of growth at 30°C (**Figure 1**). To avoid over- or under- interpretation of the antibiotic  
113 interactions, we used the median FICI value for each plate and the mean value from each of the  
114 three replicate plates for each antibiotic combination.

115 Previous work from our lab has shown that co-culture growth in the presence of antibiotics is  
116 dependent on weakest link dynamics (36). This hypothesis predicts that the MIC of an obligately  
117 cross-feeding co-culture is set by the MIC of the least tolerant species in the community. This  
118 phenomenon allows us to determine how antibiotics should interact in co-culture based on how  
119 they interact in each monoculture. A sample of these predictions are detailed in **Figure 2**. In  
120 brief, the co-culture is predicted to grow only where both species can grow individually (see  
121 plate diagrams). The impact of weakest link dynamics on antibiotic interactions depends on  
122 whether the weakest link species is the same or different in both antibiotics, and how the  
123 antibiotics interact with each species. In scenario 1, the weakest link species differs in each

124 antibiotic, but in both species the antibiotic effects are independent of each other; therefore, the  
125 antibiotics should also be independent in co-culture. This is seen in the FICI plots (where the  
126 median FICI is around 1) and in the isobolograms (where the curve is around the 1-1 line). In  
127 scenario 2, the antibiotics synergize in both species, but because weakest link species differs in  
128 each antibiotic, the synergism is weakened (though still present) in co-culture. In scenario 3, the  
129 antibiotics antagonize in both species. However, in *E. coli*, antibiotic B antagonizes antibiotic A  
130 (i.e. as the concentration of B increases, the MIC of A also increases), but not vice versa (i.e. the  
131 MIC of B does not change as the concentration of A increases). In *S. enterica*, antibiotic A  
132 antagonizes antibiotic B but not vice versa. This leads to a ‘cancelling out’ of the antagonistic  
133 interactions in co-culture and causes the antibiotics to interact independently. In scenario 4, *E.*  
134 *coli* is the weakest link species in both antibiotics. Therefore, the co-culture antibiotic interaction  
135 pattern exactly matches that of *E. coli*.

136 We first tested whether the antibiotic combinations we selected would interact as predicted in the  
137 literature in our monocultures. We tested each antibiotic combination in triplicate for *E. coli* and  
138 *S. enterica*, then calculated the median FICI value for each plate and combination (**Figure 3**).  
139 Our categories were designated as follows: FICI < 0.8 represents synergy, FICI between 0.8 and  
140 1 represent additive interactions, FICI between 1 and 2 represent independent interactions, and  
141 FICI  $\geq 2$  represents antagonism. These are less stringent than other FICI results because we  
142 chose median values to minimize the impact of plate-to-plate variation, and medians tend to bias  
143 FICI results away from detecting interactions. We also looked at isobolograms (**Figure 4**) of  
144 each antibiotic combination for each species, to get a more visual/qualitative examination of  
145 interactions between antibiotics. **Supplementary tables S2** and **S3** contain raw median and  
146 minimum FICI data, respectively.

147 Interestingly, we did see some deviations from our prediction. Nalidixic acid/bleomycin and  
148 streptomycin/ciprofloxacin were predicted to synergize; however, our FICI and isobologram data  
149 show additive/independent interactions for these antibiotics in both species. Nalidixic acid and  
150 streptomycin did synergize as predicted in *E. coli*, but not in *S. enterica*. Of the three pairs of  
151 antibiotics predicted to antagonize (nalidixic acid/ spectinomycin, nalidixic acid/doxycycline,  
152 and spectinomycin/streptomycin), only the last showed potentially antagonistic interactions; the  
153 others all interacted independently. Finally, we observed some unexpected synergy in our  
154 antibiotic pairs which were predicted to interact additively/independently.

155 Ciprofloxacin/bleomycin synergized in *E. coli*, and spectinomycin/doxycycline synergized in  
156 both species; however, this is more evident in the FICI data than in the isobolograms. The  
157 isobolograms suggest that low concentrations of doxycycline decrease the MIC of  
158 spectinomycin, but not vice versa; that is, doxycycline synergizes with spectinomycin to increase  
159 the latter's potency, but spectinomycin does not change the effect of doxycycline.

160 Based on our results from monoculture and our weakest link hypothesis, we then predicted the  
161 antibiotic interactions which would arise in obligate cross-feeding co-culture. To generate these  
162 predictions, we examined the monoculture growth patterns in each antibiotic combination (i.e. at  
163 which concentrations of each antibiotic monoculture growth occurred). We then generated a  
164 predicted growth pattern for the co-culture wherein growth would only occur at antibiotic  
165 concentrations where both species could grow. From this predicted growth pattern, we calculated  
166 FICIs and generated isobolograms; these can be seen in **Figure 5** and **6**, respectively. An  
167 example of how this was done can be found in **Supplementary figure S1**.

168 According to our predictions, if one species is the weakest link (i.e. the least tolerant) in both  
169 antibiotics, the co-culture interaction typically matched that of the weakest link monoculture.



170 This is the case for nalidixic acid/bleomycin and nalidixic acid/ciprofloxacin (where *S. enterica*  
171 is the weakest link), and for streptomycin/ciprofloxacin, spectinomycin/streptomycin,  
172 streptomycin/doxycycline, and spectinomycin/doxycycline (where *E. coli* is the weakest link).  
173 Co-culture predictions were somewhat more complicated for the other combinations (nalidixic  
174 acid/ streptomycin, nalidixic acid/spectinomycin, nalidixic acid/doxycycline, and ciprofloxacin/  
175 bleomycin), where each species is the weakest link in a different antibiotic. We were particularly  
176 interested in nalidixic acid/streptomycin, as these antibiotics synergize in *E. coli* (which is the  
177 weakest link in streptomycin) and interact independently in *S. enterica* (which is the weakest link  
178 in nalidixic acid). Based on the differences in MIC in these species in each antibiotic (see  
179 **Supplementary table S4**), we predicted an independent interaction in co-culture. Similarly, in  
180 the ciprofloxacin/ bleomycin combination, the antibiotics verged on antagonizing in *E. coli* and  
181 interacted independently in *S. enterica*; however, their MICs were similar in both antibiotics.  
182 This provided an opportunity to examine interactions in co-culture where weakest link dynamics  
183 might play less of a role.

184 After generating predicted FICIs based on our monoculture results and weakest link dynamics,  
185 we tested antibiotic interactions in co-culture. We then compared our predicted FICIs to those  
186 observed experimentally for each antibiotic combination. Qualitatively, our predictions based on  
187 weakest link were accurate — the antibiotic interaction category (antagonism/synergy/additive)  
188 identified by predicted FICIs matched the interaction category identified by the observed FICIs  
189 (**Figure 5**, see **Supplementary Table S5** for raw FICI data). This supports our hypothesis that  
190 weakest-link dynamics can be used to predict antibiotic interaction categories in co-culture. The  
191 one exception to this was in the spectinomycin/ streptomycin combination. While there was no  
192 statistical significance in this difference, ( $P= 0.37$ ), we predicted an independent interaction and

193 observed an antagonistic interaction. Interestingly, the isobologram suggested that antibiotics  
194 antagonized much more in co-culture than we predicted. This suggests that weakest-link  
195 dynamics may not always predict co-culture outcomes and that some other factor may be  
196 determining antibiotic interactions in this case. Quantitatively, our FICI predictions also matched  
197 that of our observed data (see **Supplementary Table S6** for all  $P$ -values), with one exception.  
198 The predicted FICI for the nalidixic acid/ spectinomycin combination was significantly higher  
199 than predicted ( $P= 0.037$ ), but this difference still resulted in independent interactions and so is  
200 likely not biologically significant. Overall, weakest-link dynamics were generally sufficient to  
201 both qualitatively and quantitatively predict antibiotic interactions in co-cultures.

202

## 203 **Discussion**

204 The goal of this work was to identify whether our previously identified weakest link hypothesis,  
205 wherein the antibiotic tolerance of a mutualistic co-culture is set by the weakest link species,  
206 could change drug interaction patterns in antibiotic combinations. We tested previously  
207 identified antibiotic combinations in each of our monocultures. Few of the predicted interactions  
208 applied to our monocultures, possibly for reasons discussed below. However, we then used the  
209 interactions we identified in monoculture, as well as our knowledge of weakest link dynamics, to  
210 predict how each set of antibiotics would interact in co-culture. We found that our predictions  
211 were qualitatively correct, with predicted and observed FICIs and isobolograms falling into the  
212 same antibiotic interaction category (synergistic, additive, independent, or antagonistic). The one  
213 exception to this was the spectinomycin/streptomycin combination, which antagonized more  
214 strongly in co-culture than we predicted from monoculture.

215 Our findings demonstrate an important and hitherto unexplored explanation for why *in vivo*  
216 antibiotic interactions do not match *in vitro* assay predictions. Many infections are now known to  
217 be polymicrobial (27, 28, 35, 39) and likely involve some form of cooperative metabolite  
218 exchange. These ecological interactions may be at least partially responsible for the difficulty in  
219 finding a successful synergistic antibiotic treatment. Indeed, our results suggest that cross-  
220 feeding generally ablates any antagonistic/ synergistic antibiotic interactions unless one partner  
221 is the weakest link in every antibiotic (**Figure 2**); whether or not this is the case in natural  
222 microbial communities is unknown. Helpfully, our results suggest that the antibiotic interactions  
223 at the community level are predictable given the right information — i.e. if the individual  
224 resistances and antibiotic interaction patterns are known for each species in the community, the  
225 antibiotic interaction pattern is generally predictable based on weakest link dynamics. This adds  
226 further weight to the argument that microbial ecology must be considered when treating bacterial  
227 infections in the clinic.

228 Unexpectedly, the antibiotic interactions that we observed in our monocultures did not match the  
229 interactions that Yeh et al. had previously observed (16). The most likely reason for this is their  
230 use of a growth rate-based measurement method, a dose-response curve (12), versus our yield-  
231 based checkerboard assay. We elected to do a yield-based method because it allowed us to more  
232 highly parallelize our experiments and decrease plate-to-plate variation in cell density and  
233 growth phase, both of which are known to significantly impact antibiotic tolerance (40–42).  
234 Much research has been done on the best method for assessing antibiotic synergy/antagonism  
235 (12, 43, 44); we selected the checkerboard method also because of its widespread use and ease of  
236 interpretation. Future experiments using dose-response curves might be particularly important

237 for cross-feeding systems such as ours, as cross-feeding is known to alter growth rates of  
238 member species (45, 46).

239 An additional challenge in interpreting antibiotic interactions in multispecies contexts is the  
240 possibility of antibiotic interactions changing depending on which species is the weakest link at a  
241 given combination of antibiotic combinations. Taking the largest FICI value from a plate biases  
242 results towards antagonism and taking the smallest value biases towards synergy. Therefore, the  
243 median value is useful in avoiding overinterpretation of data; however, it obscures any  
244 concentration-specific changes in interactions which might be occurring. We reported  
245 isobolograms and FICIs for this reason. Isobolograms provide more information as to how the  
246 antibiotics are interacting at different concentration combinations than FICIs. The isobologram  
247 of nalidixic acid/bleomycin in **Figure 6** provides a good example of this. The predicted co-  
248 culture isobole showed additive-synergistic interactions; however, the observed co-culture  
249 isobole showed synergistic interactions at low bleomycin FIC values. A similar pattern is seen  
250 with ciprofloxacin/bleomycin in the same figure. While these patterns may be artifacts of our  
251 system, it remains possible that checkerboard assays involving multiple species may produce  
252 isobologram patterns which deviate from the typical convex/concave, antagonism/synergy  
253 pattern seen in monocultures. Mathematical modeling of how different antibiotic interactions and  
254 MICs in each species impact co-culture antibiotic interactions may be a useful way to explore  
255 this possibility.

256 The one drug interaction in our study where weakest link dynamics appeared insufficient to  
257 predict co-culture interactions was the streptomycin/spectinomycin combination. These drugs  
258 were predicted to antagonize in *E. coli*; though they have similar mechanisms of action,  
259 spectinomycin ionically inhibits entry of streptomycin into the cell (47). Given that *E. coli* was

260 the weakest link in both antibiotics, we predicted similar dynamics in co-cultures; additive  
261 interactions bordering on antagonism (i.e. FICIs between 1.5 and 2). However, the degree of  
262 antagonism that we observed was much higher than predicted. There could be several reasons for  
263 this. Given that disruptions in protein biosynthesis have pleiotropic effects on cell physiology  
264 and metabolism (48), the application of both drugs might have sufficiently disrupted the cross-  
265 feeding between our species such that they starved at otherwise sublethal concentrations of each  
266 antibiotic. That antibiotics can arrest growth rate (49, 50) and change metabolic profile (51, 52)  
267 of cells is well known; what is less clear is how this might impact metabolite exchange in  
268 antibiotic-exposed natural microbial communities. The complex and often non-obligate  
269 metabolite exchange food webs in natural communities (53, 54) might make this question  
270 difficult to answer, but our study suggests that weakest link dynamics are a useful null  
271 hypothesis starting point.

272 Though much research has been done *in vitro* on antibiotic synergy/antagonism, it remains  
273 unclear what the biological/clinical relevance of any of these interactions truly are. With a few  
274 exceptions (2, 7), antibiotic synergy has yet to be adopted as a clinically important treatment  
275 strategy despite some success in mouse models (55, 56). Differences in drug half-life and  
276 bioavailability can impact effective dosages *in vivo* (57), and strain-specific resistance profiles  
277 make assessment of antibiotic synergy challenging in the clinic (12). However, antibiotic  
278 combinations may become a critical clinical tool as resistance continues to rise (13). Further  
279 research is therefore required not just on how antibiotics interact *in vitro*, but how they interact in  
280 natural environments— both within the host, and within a multispecies community.

281

282 **Methods**

283 Our model microbial community has been previously described (37). Briefly, our system consists  
284 of an *E. coli* methionine auxotroph, and an *S. enterica* strain which has been evolved to secrete  
285 excess methionine. In a lactose environment, *E. coli* metabolizes lactose to produce acetate for *S.*  
286 *enterica*, which in turn supplies methionine for *E. coli*. Each species can also be grown in  
287 monoculture by supplying *E. coli* with methionine and lactose, and *S. enterica* with acetate.

288 We performed checkerboard assays (described below) with six antibiotics in ten different  
289 combinations predicted to synergize (3), antagonize (3), or not interact (4)— see **Table 1** for  
290 these combinations. For each drug combination, we tested *E. coli* and *S. enterica* in  
291 monocultures, and the two-species in obligate co-culture. Each antibiotic combination/culture  
292 type was tested in triplicate. Seven two-fold dilutions of each antibiotic, along with an antibiotic–  
293 free control for each, were used in orthogonal gradients on a 96-well plate such that the antibiotic  
294 concentrations increased from left-to-right and top-to-bottom. The first row and column of each  
295 plate were antibiotic–free wells for the vertically– and horizontally– distributed antibiotics,  
296 respectively. The minimum inhibitory concentrations (MICs) for each antibiotic were determined  
297 in the absence of the other antibiotic. Mid-log–phase cells (OD~0.4) were grown up on the day  
298 of the experiment in species–specific Hypho growth medium (36) and 2 $\mu$ L was inoculated into  
299 194 $\mu$ L fresh species-specific Hypho. Antibiotic stocks were prepared within two days of the  
300 experiment such that 2 $\mu$ L of stock could be added to each well to achieve the desired gradient  
301 concentrations. Plates were then incubated at 30°C with shaking for 48 hours. A Tecan plate  
302 reader was then used to measure the OD600 and species-specific fluorescence (CFP for *E. coli*  
303 and YFP for *S. enterica*). The 90% minimum inhibitory concentration (MIC<sub>90</sub>) was then used to  
304 establish which wells showed growth. Any well that had an OD600 or fluorescent protein value  
305 above 10% of the highest plate value was considered growth. We used the highest plate value

306 rather than the antibiotic-free well because we consistently saw a slight increase in OD600 in the  
307 co-cultures at sublethal concentrations, possibly due to a low level of cell lysis and subsequent  
308 boost for the cross-feeding partner (58, 59).

309 We used the Loewe additivity method to identify the nature of our antibiotic interactions as  
310 previously described (6). Briefly, we calculated the fractional inhibitory concentration (FIC) for  
311 antibiotics A and B as follows:  $FIC_A = (MIC_{A \text{ in combination}} / MIC_{A \text{ alone}})$ , and  $FIC_B = (MIC_B \text{ in}$   
312  $\text{combination} / MIC_{B \text{ alone}})$ . FIC values were obtained for each well at the edge of growth, as shown in  
313 **Figure 1**. The FICI is the sum of  $FIC_A$  and  $FIC_B$  (60). As there are multiple FICI values per  
314 plate, we chose to report the median FICI value as the plate value. We did not use the minimum  
315 or maximum FICI value so that we would not over-interpret synergy or antagonism results,  
316 respectively (61). Minimum FICI values can be found in **Supplementary table S3**. Our cut-off  
317 values were designed as follows:  $FICI < 0.8$  represents synergy; FICI between 0.8 and 2  
318 represent additive interactions, FICI between 1 and 2 represent independent interactions, and  
319  $FICI \geq 2$  represents antagonism (60–63). Isobolograms were generated by plotting the  $FIC_A$  and  
320  $FIC_B$  values as x,y coordinates. A straight line connecting the FIC values represents additive  
321 interactions; a concave line represents synergy; and a convex line represents antagonism.

322 Based on observed monoculture growth patterns (MICs and FICs in each antibiotic  
323 combination), we predicted co-culture growth patterns assuming weakest link dynamics; that is,  
324 co-cultures should only grow at concentrations of both antibiotics where both species are able to  
325 grow in monoculture. We then calculated FICs and FICIs for these predicted co-culture plates  
326 and compared them to our observed data. We then used a Mann-Whitney U test to compare  
327 predicted versus observed FICIs for our co-cultures.

328

329 **Acknowledgements**

330 The authors would like to thank Jeremy Chacón, Lisa Fazzino, Sarah Hammarlund, Brian Smith,  
331 and Leno Bernard Smith Jr. for their insights on this work. This work was supported by a  
332 Natural Sciences and Engineering Research Council of Canada Postgraduate Scholarship  
333 (PGSD2-487305-2016, to E.M.A) and by a National Institutes of Health Award (1R01-  
334 GM121498, to W.R.H.).

335

336 **References**

- 337 1. Lesho EP, Laguio-Vila M. 2019. The slow-motion catastrophe of antimicrobial resistance  
338 and practical interventions for all prescribers. *Mayo Clin Proc* 94:1040–1047.
- 339 2. Furin J, Cox H, Pai M. 2019. Tuberculosis. *The Lancet* 393:1642–1656.
- 340 3. Lee DS, Lee S-J, Choe H-S. 2018. Community-acquired urinary tract infection by  
341 *Escherichia coli* in the era of antibiotic resistance. *BioMed Res Int* 2018: 7656752.
- 342 4. Vestergaard M, Frees D, Ingmer H. 2019. Antibiotic resistance and the MRSA problem.  
343 *Microbiol Spectr* 7(2).
- 344 5. Wright GD. 2016. Antibiotic adjuvants: Rescuing antibiotics from resistance. *Trends*  
345 *Microbiol* 24:862–871.
- 346 6. Singh N, Yeh PJ. 2017. Suppressive drug combinations and their potential to combat  
347 antibiotic resistance. *J Antibiot (Tokyo)* 70:1033–1042.



- 348 7. González-Bello C. 2017. Antibiotic adjuvants – A strategy to unlock bacterial resistance to  
349 antibiotics. *Bioorg Med Chem Lett* 27:4221–4228.
- 350 8. Arhel N, Kirchhoff F. 2010. Host proteins involved in HIV infection: New therapeutic  
351 targets. *Biochim Biophys Acta BBA - Mol Basis Dis* 1802:313–321.
- 352 9. Simonetti FR, Kearney MF. 2015. Review: influence of ART on HIV genetics. *Curr Opin*  
353 *HIV AIDS* 10:49–54.
- 354 10. Chatterjee N, Bivona TG. 2019. Polytherapy and targeted cancer drug resistance. *Trends*  
355 *Cancer* 5:170–182.
- 356 11. Sánchez-Gundín J, Fernández-Carballido AM, Martínez-Valdivieso L, Barreda-Hernández  
357 D, Torres-Suárez AI. 2018. New trends in the therapeutic approach to metastatic colorectal  
358 cancer. *Int J Med Sci* 15:659–665.
- 359 12. Katzir I, Cokol M, Aldridge BB, Alon U. 2019. Prediction of ultra-high-order antibiotic  
360 combinations based on pairwise interactions. *PLoS Comput Biol* 15.
- 361 13. Eliopoulos GM, Eliopoulos CT. 1988. Antibiotic combinations: should they be tested? *Clin*  
362 *Microbiol Rev* 1:139–156.
- 363 14. Tängdén T. 2014. Combination antibiotic therapy for multidrug-resistant Gram-negative  
364 bacteria. *Ups J Med Sci* 119:149–153.
- 365 15. Kumar A, Safdar N, Kethireddy S, Chateau D. 2010. A survival benefit of combination  
366 antibiotic therapy for serious infections associated with sepsis and septic shock is

- 367 contingent only on the risk of death: A meta-analytic/meta-regression study. *Crit Care Med*  
368 38:1651.
- 369 16. Yeh P, Tschumi AI, Kishony R. 2006. Functional classification of drugs by properties of  
370 their pairwise interactions. *Nat Genet* 38:489–494.
- 371 17. Acar JF. 2000. Antibiotic synergy and antagonism. *Med Clin North Am* 84:1391–1406.
- 372 18. Yadav R, Bulitta JB, Schneider EK, Shin BS, Velkov T, Nation RL, Landersdorfer CB.  
373 2017. Aminoglycoside concentrations required for synergy with carbapenems against  
374 *Pseudomonas aeruginosa* determined via mechanistic studies and modeling. *Antimicrob*  
375 *Agents Chemother* 61.
- 376 19. Hu Y, Liu A, Vaudrey J, Vaiciunaite B, Moigboi C, McTavish SM, Kearns A, Coates A.  
377 2015. Combinations of  $\beta$ -Lactam or aminoglycoside antibiotics with plectasin are  
378 synergistic against methicillin-sensitive and methicillin-resistant *Staphylococcus aureus*.  
379 *PLoS ONE* 10.
- 380 20. Kohanski MA, Dwyer DJ, Collins JJ. 2010. How antibiotics kill bacteria: from targets to  
381 networks. *Nat Rev Microbiol* 8:423–435.
- 382 21. Liu Y, Li R, Xiao X, Wang Z. 2018. Molecules that inhibit bacterial resistance enzymes.  
383 *Molecules* 24.
- 384 22. Wittekind M, Schuch R. 2016. Cell wall hydrolases and antibiotics: exploiting synergy to  
385 create efficacious new antimicrobial treatments. *Curr Opin Microbiol* 33:18–24.

- 386 23. Minato Y, Dawadi S, Kordus SL, Sivanandam A, Aldrich CC, Baughn AD. 2018. Mutual  
387 potentiation drives synergy between trimethoprim and sulfamethoxazole. *Nat Commun* 9.
- 388 24. Sanders CC, Sanders WE, Goering RV. 1982. In vitro antagonism of beta-lactam antibiotics  
389 by cefoxitin. *Antimicrob Agents Chemother* 21:968–975.
- 390 25. Weisblum B, Demohn V. 1969. Erythromycin-inducible resistance in *Staphylococcus*  
391 *aureus*: survey of antibiotic classes involved. *J Bacteriol* 98:447–452.
- 392 26. Bollenbach T, Quan S, Chait R, Kishony R. 2009. Non-optimal microbial response to  
393 antibiotics underlies suppressive drug interactions. *Cell* 139:707–718.
- 394 27. Stacy A, McNally L, Darch SE, Brown SP, Whiteley M. 2016. The biogeography of  
395 polymicrobial infection. *Nat Rev Microbiol* 14:93–105.
- 396 28. Murray JL, Connell JL, Stacy A, Turner KH, Whiteley M. 2014. Mechanisms of synergy in  
397 polymicrobial infections. *J Microbiol Seoul Korea* 52:188–199.
- 398 29. Hardak E, Avivi I, Berkun L, Raz-Pasteur A, Lavi N, Geffen Y, Yigla M, Oren I. 2016.  
399 Polymicrobial pulmonary infection in patients with hematological malignancies:  
400 prevalence, co-pathogens, course and outcome. *Infection* 44:491–497.
- 401 30. Royo-Cebrecos C, Gudiol C, Ardanuy C, Pomares H, Calvo M, Carratalà J. 2017. A fresh  
402 look at polymicrobial bloodstream infection in cancer patients. *PloS One* 12:e0185768.
- 403 31. Trifilio S, Zhou Z, Fong JL, Zomas A, Liu D, Zhao C, Zhang J, Mehta J. 2015.  
404 Polymicrobial bacterial or fungal infections: incidence, spectrum of infection, risk factors,

- 405 and clinical outcomes from a large hematopoietic stem cell transplant center. *Transpl Infect*  
406 *Dis Off J Transplant Soc* 17:267–274.
- 407 32. Figa R, Muñetón D, Gómez L, Matamala A, Lung M, Cuchi E, Corona PS. 2017.  
408 Periprosthetic joint infection by *Propionibacterium acnes*: Clinical differences between  
409 monomicrobial versus polymicrobial infection. *Anaerobe* 44:143–149.
- 410 33. Shah PM, Edwards BL, Dietch ZC, Guidry CA, Davies SW, Hennessy SA, Duane TM,  
411 O’Neill PJ, Coimbra R, Cook CH, Askari R, Popovsky K, Sawyer RG. 2016. Do  
412 polymicrobial intra-abdominal infections have worse outcomes than monomicrobial intra-  
413 abdominal infections? *Surg Infect* 17:27–31.
- 414 34. Beardmore RE, Cook E, Nilsson S, Smith AR, Tillmann A, Esquivel BD, Haynes K, Gow  
415 NAR, Brown AJP, White TC, Gudelj I. 2018. Drug-mediated metabolic tipping between  
416 antibiotic resistant states in a mixed-species community. *Nat Ecol Evol* 1.
- 417 35. Gabriliska RA, Rumbaugh KP. 2015. Biofilm models of polymicrobial infection. *Future*  
418 *Microbiol* 10:1997–2015.
- 419 36. Adamowicz EM, Flynn J, Hunter RC, Harcombe WR. 2018. Cross-feeding modulates  
420 antibiotic tolerance in bacterial communities. *ISME J* 12:2723–2735.
- 421 37. Harcombe W. 2010. Novel cooperation experimentally evolved between species. *Evolution*  
422 64:2166–2172.

- 423 38. Harcombe WR, Riehl WJ, Dukovski I, Granger BR, Betts A, Lang AH, Bonilla G, Kar A,  
424 Leiby N, Mehta P, Marx CJ, Segrè D. 2014. Metabolic resource allocation in individual  
425 microbes determines ecosystem interactions and spatial dynamics. *Cell Rep* 7:1104–1115.
- 426 39. Nelson A, De Soyza A, Perry JD, Sutcliffe IC, Cummings SP. 2012. Polymicrobial  
427 challenges to Koch’s postulates: Ecological lessons from the bacterial vaginosis and cystic  
428 fibrosis microbiomes. *Innate Immun* 18:774–783.
- 429 40. Corona F, Martinez JL. 2013. Phenotypic resistance to antibiotics. *Antibiot Basel Switz*  
430 2:237–255.
- 431 41. Andersson DI, Hughes D. 2010. Antibiotic resistance and its cost: is it possible to reverse  
432 resistance? *Nat Rev Microbiol* 8:260–271.
- 433 42. Lee AJ, Wang S, Meredith HR, Zhuang B, Dai Z, You L. 2018. Robust, linear correlations  
434 between growth rates and  $\beta$ -lactam-mediated lysis rates. *Proc Natl Acad Sci U S A*  
435 115:4069–4074.
- 436 43. Ocampo PS, Lázár V, Papp B, Arnoldini M, Wiesch PA zur, Busa-Fekete R, Fekete G, Pál  
437 C, Ackermann M, Bonhoeffer S. 2014. Antagonism between bacteriostatic and bactericidal  
438 antibiotics is prevalent. *Antimicrob Agents Chemother* 58:4573–4582.
- 439 44. Fouquier J, Guedj M. 2015. Analysis of drug combinations: current methodological  
440 landscape. *Pharmacol Res Perspect* 3.
- 441 45. Harcombe WR, Betts A, Shapiro JW, Marx CJ. 2016. Adding biotic complexity alters the  
442 metabolic benefits of mutualism. *Evol Int J Org Evol* 70:1871–1881.

- 443 46. Groot J, Cepress-Mclean SC, Robbins-Pianka A, Knight R, Gill RT. 2017. Multiplex  
444 growth rate phenotyping of synthetic mutants in selection to engineer glucose and xylose  
445 co-utilization in *Escherichia coli*. *Biotechnol Bioeng* 114:885–893.
- 446 47. Hancock REW. 1981. Aminoglycoside uptake and mode of action—with special reference  
447 to streptomycin and gentamicin I. Antagonists and mutants. *J Antimicrob Chemother*  
448 8:249–276.
- 449 48. Menninger JR. 1995. Mechanism of inhibition of protein synthesis by macrolide and  
450 lincosamide antibiotics. *J Basic Clin Physiol Pharmacol* 6:229–250.
- 451 49. Greulich P, Doležal J, Scott M, Evans MR, Allen RJ. 2017. Predicting the dynamics of  
452 bacterial growth inhibition by ribosome-targeting antibiotics. *Phys Biol* 14:065005.
- 453 50. Li B, Qiu Y, Shi H, Yin H. 2016. The importance of lag time extension in determining  
454 bacterial resistance to antibiotics. *Analyst* 141:3059–3067.
- 455 51. Zampieri M, Zimmermann M, Claassen M, Sauer U. 2017. Nontargeted metabolomics  
456 reveals the multilevel response to antibiotic perturbations. *Cell Rep* 19:1214–1228.
- 457 52. Vincent IM, Ehmann DE, Mills SD, Perros M, Barrett MP. 2016. Untargeted metabolomics  
458 to ascertain antibiotic modes of action. *Antimicrob Agents Chemother* 60:2281–2291.
- 459 53. Freilich S, Zarecki R, Eilam O, Segal ES, Henry CS, Kupiec M, Gophna U, Sharan R,  
460 Ruppin E. 2011. Competitive and cooperative metabolic interactions in bacterial  
461 communities. *Nat Commun* 2:589.

- 462 54. Sanchez-Gorostiaga A, Bajić D, Osborne ML, Poyatos JF, Sanchez A. 2019. High-order  
463 interactions dominate the functional landscape of microbial consortia. *PLOS Biology*  
464 17(12): e30000550.
- 465 55. Annamanedi M, Varma GYN, Anuradha K, Kalle AM. 2017. Celecoxib enhances the  
466 efficacy of low-dose antibiotic treatment against polymicrobial sepsis in mice and clinical  
467 isolates of ESKAPE pathogens. *Front Microbiol* 8:805.
- 468 56. Patel A, Joseph J, Periasamy H, Mokale S. 2018. Azithromycin in combination with  
469 ceftriaxone reduces systemic inflammation and provides survival benefit in a murine model  
470 of polymicrobial sepsis. *Antimicrob Agents Chemother* 62.
- 471 57. Sy SKB, Zhuang L, Derendorf H. 2016. Pharmacokinetics and pharmacodynamics in  
472 antibiotic dose optimization. *Expert Opin Drug Metab Toxicol* 12:93–114.
- 473 58. Fazzino L, Anisman J, Chacón JM, Heineman RH, Harcombe WR. 2020. Lytic  
474 bacteriophage have diverse indirect effects in a synthetic cross-feeding community. *ISME J*  
475 14:123–134.
- 476 59. Leisner JJ, Jørgensen NOG, Middelboe M. 2016. Predation and selection for antibiotic  
477 resistance in natural environments. *Evol Appl* 9:427–434.
- 478 60. Fratini F, Mancini S, Turchi B, Friscia E, Pistelli L, Giusti G, Cerri D. 2017. A novel  
479 interpretation of the Fractional Inhibitory Concentration Index: The case *Origanum vulgare*  
480 L. and *Leptospermum scoparium* J. R. et G. Forst essential oils against *Staphylococcus*  
481 *aureus* strains. *Microbiol Res* 195:11–17.

- 482 61. Stein C, Makarewicz O, Bohnert JA, Pfeifer Y, Kesselmeier M, Hagel S, Pletz MW. 2015.  
483 Three dimensional checkerboard synergy analysis of colistin, meropenem, tigecycline  
484 against multidrug-resistant clinical *Klebsiella pneumonia* isolates. PLoS ONE 10.
- 485 62. Chase P, Enogieru I, Madoux F, Bishop E, Beer J, Scampavia L, Spicer T. 2016. An  
486 automated miniaturized method to perform and analyze antimicrobial drug synergy assays.  
487 Assay Drug Dev Technol 14:58–66.
- 488 63. Singh V, Bala M, Bhargava A, Kakran M, Bhatnagar R. 2018. In vitro efficacy of 21 dual  
489 antimicrobial combinations comprising novel and currently recommended combinations for  
490 treatment of drug resistant gonorrhoea in future era. PLoS ONE 13.
- 491



492 **Figures and Tables**

493 **Table 1.** Antibiotic combinations used in the study and their predicted interactions in *E. coli*

494 based on Yeh et al. 2006.

| <b>Synergy</b>                  | <b>Antagonism</b>                | <b>Additive</b>                  |
|---------------------------------|----------------------------------|----------------------------------|
| Nalidixic acid and streptomycin | Nalidixic acid and spectinomycin | Nalidixic acid and ciprofloxacin |
| Nalidixic acid and bleomycin    | Nalidixic acid and doxycycline   | Ciprofloxacin and bleomycin      |
| Streptomycin and ciprofloxacin  | Spectinomycin and streptomycin   | Streptomycin and doxycycline     |
|                                 |                                  | Spectinomycin and doxycycline    |

495

496

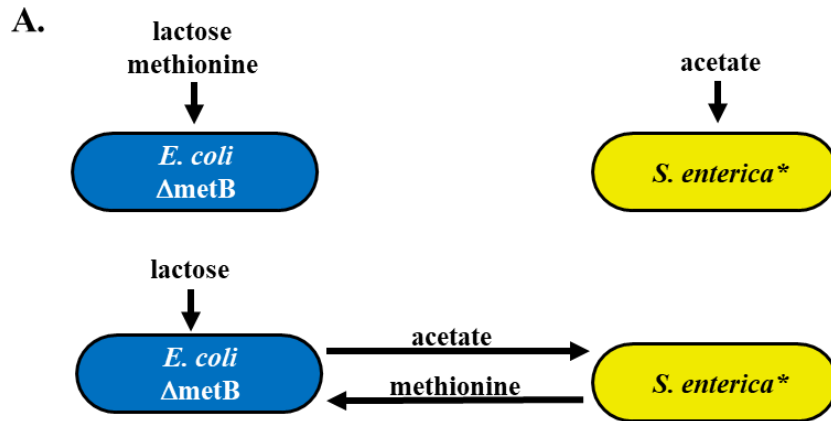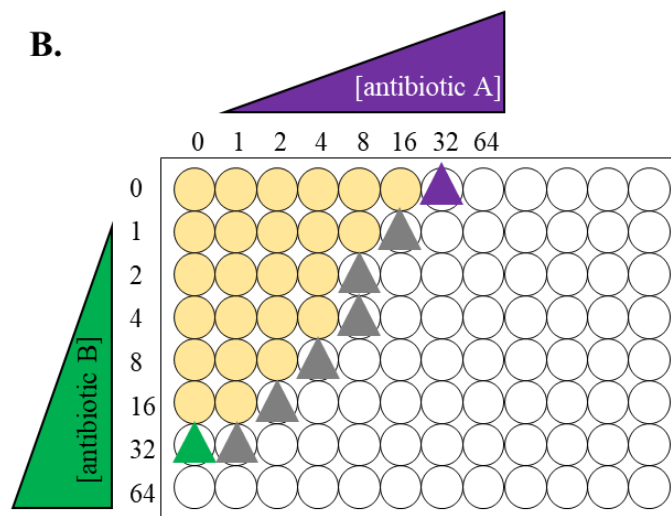

**C.**

$$FIC_A = (MIC_{A \text{ with } B}) / (MIC_{A \text{ alone}})$$

$$FIC_B = (MIC_{B \text{ with } A}) / (MIC_{B \text{ alone}})$$

$$FICI = FIC_A + FIC_B$$

| MIC A | FIC A   | MIC B | FIC B   | FICI    |
|-------|---------|-------|---------|---------|
| 0     | 0       | 32    | 1       | 1       |
| 1     | 0.03125 | 32    | 1       | 1.03125 |
| 2     | 0.0625  | 16    | 0.5     | 0.5625  |
| 4     | 0.125   | 8     | 0.25    | 0.375   |
| 8     | 0.25    | 4     | 0.125   | 0.375   |
| 8     | 0.25    | 2     | 0.0625  | 0.3125  |
| 16    | 0.5     | 1     | 0.03125 | 0.53125 |
| 32    | 1       | 0     | 0       | 1       |

497

498

499 **Figure 1.** Antibiotic interaction experimental setup and hypotheses. **A.** The two-species obligate  
500 cross-feeding system. When lactose is supplied, *E. coli* uses it to produce acetate for *S. enterica*,  
501 which produces methionine for *E. coli*. Each species can be grown in co-culture or monoculture,  
502 depending on the metabolites supplied. **B.** Setup for checkerboard assays. Seven antibiotic  
503 concentrations plus one antibiotic-free well were developed for each antibiotic/ species  
504 combination, with the MIC approximately in the middle of the gradient. Mid-log phase cells  
505 were inoculated into plates containing species-specific growth medium and antibiotic at twofold  
506 dilutions. Cells were allowed to grow for 48 hours at 30°C with shaking, and a Tecan plate  
507 reader was used to measure growth at OD600. Growth was defined as an OD600 above 10% of  
508 the maximum OD600 obtained on each plate. Three replicates of each antibiotic/ culture  
509 condition were obtained. **C.** Table of calculations for fractional inhibitory concentrations and  
510 formulae used.

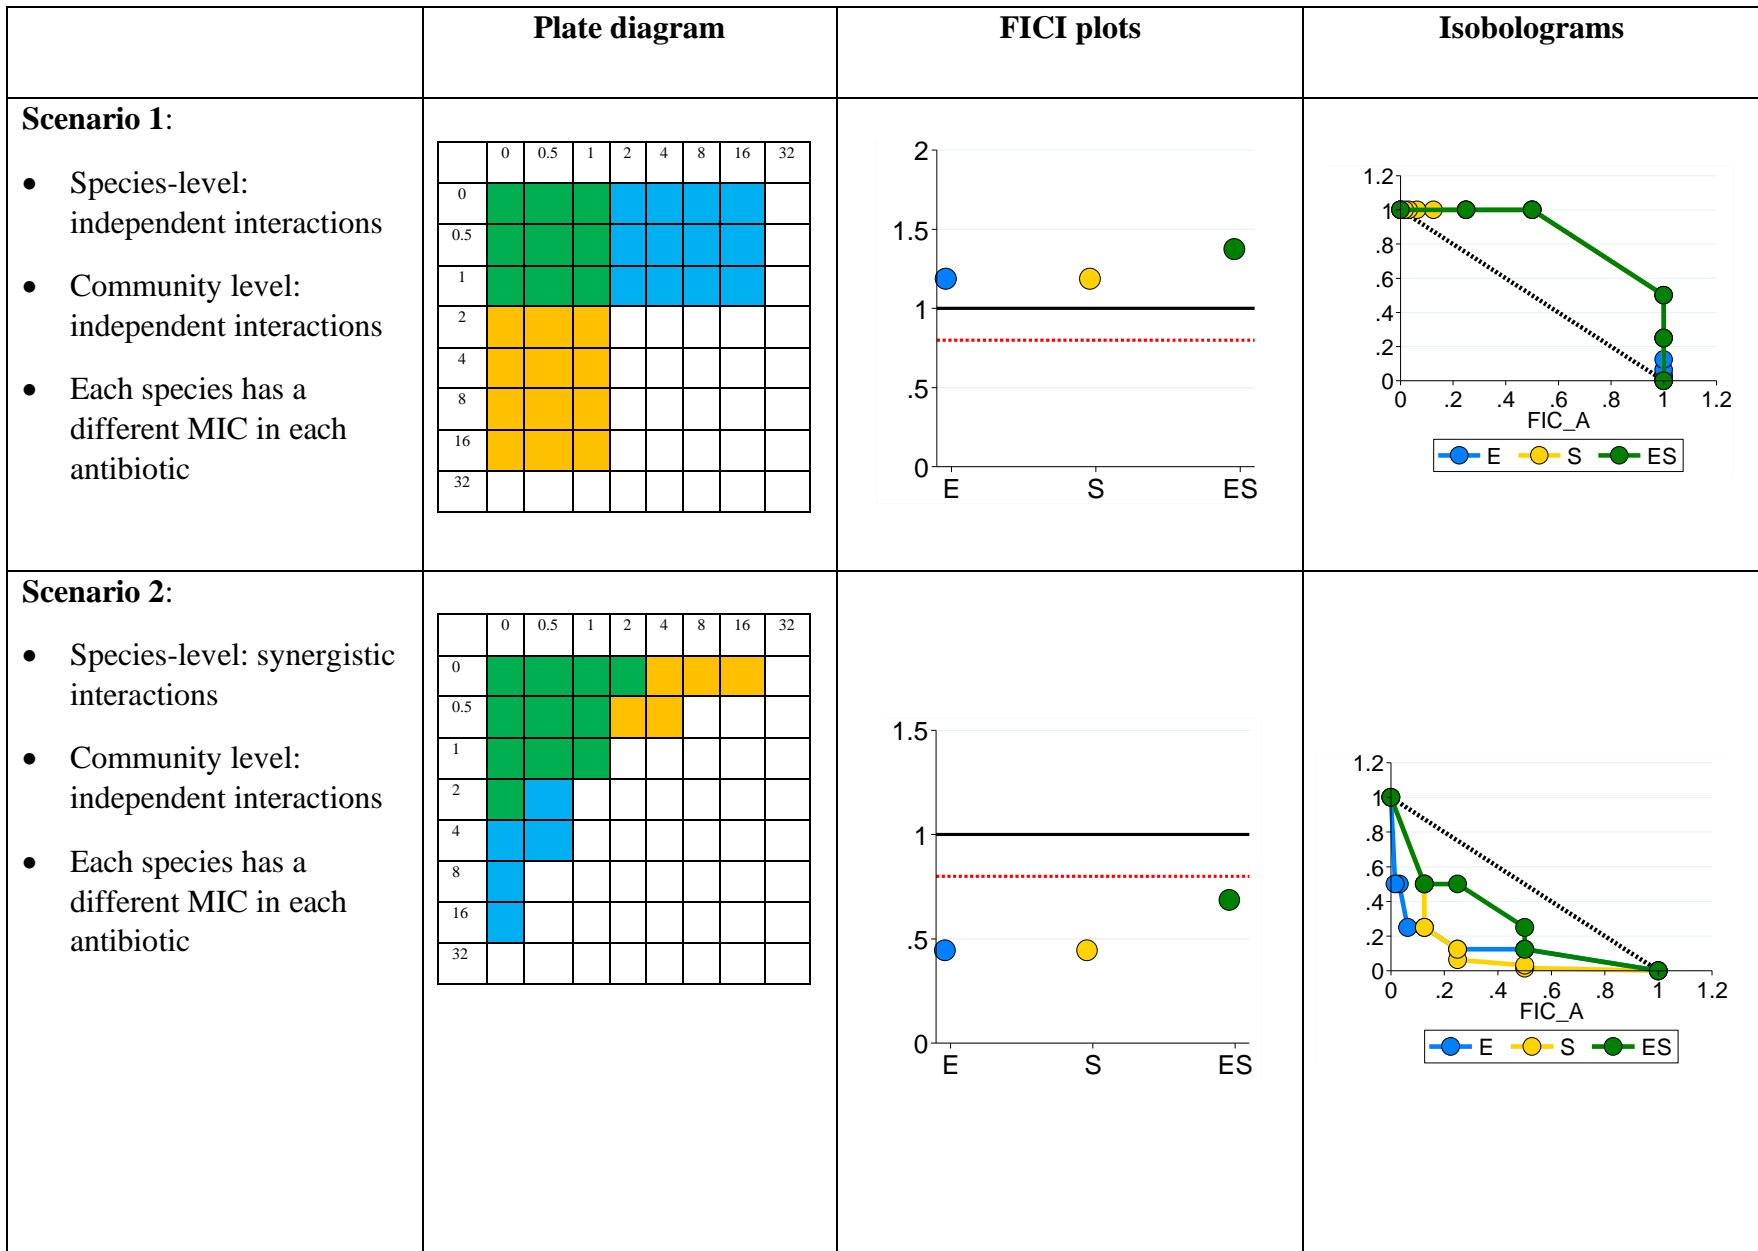

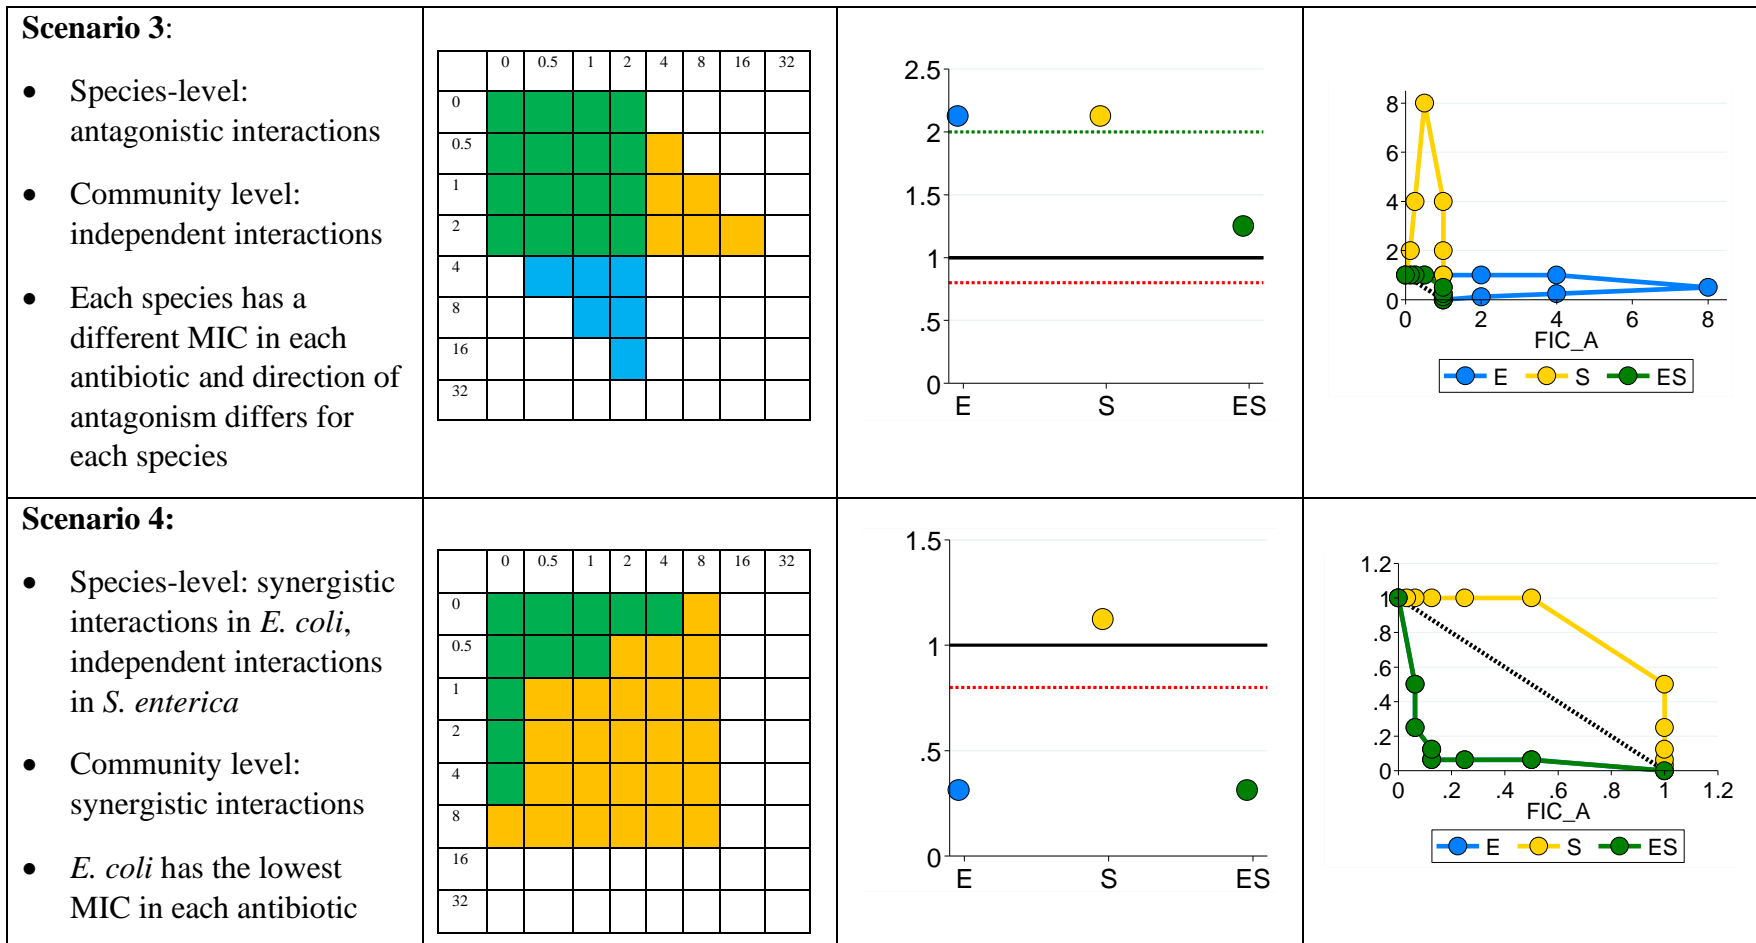

511  
 512 **Figure 2.** Antibiotic interactions at the species level versus the co-culture level. In the plate diagrams (simulated data), blue cells  
 513 represent concentrations where only *E. coli* can grow; yellow cells represent concentrations where only *S. enterica* can grow, and  
 514 green cells represent concentrations where the co-culture can grow (i.e. concentrations where both monocultures can grow). Antibiotic

515 A is on the y-axis and antibiotic B is on the X-axis. Points that fall below the red dotted line on FICI plots represent synergistic  
516 interactions; points that fall above the green dotted line represent antagonistic interactions. FICI plots and isobolograms were  
517 calculated based on the simulated data in plate diagrams (see **Methods**). Concave isoboles represent synergy; convex isoboles  
518 represent antagonism.

519

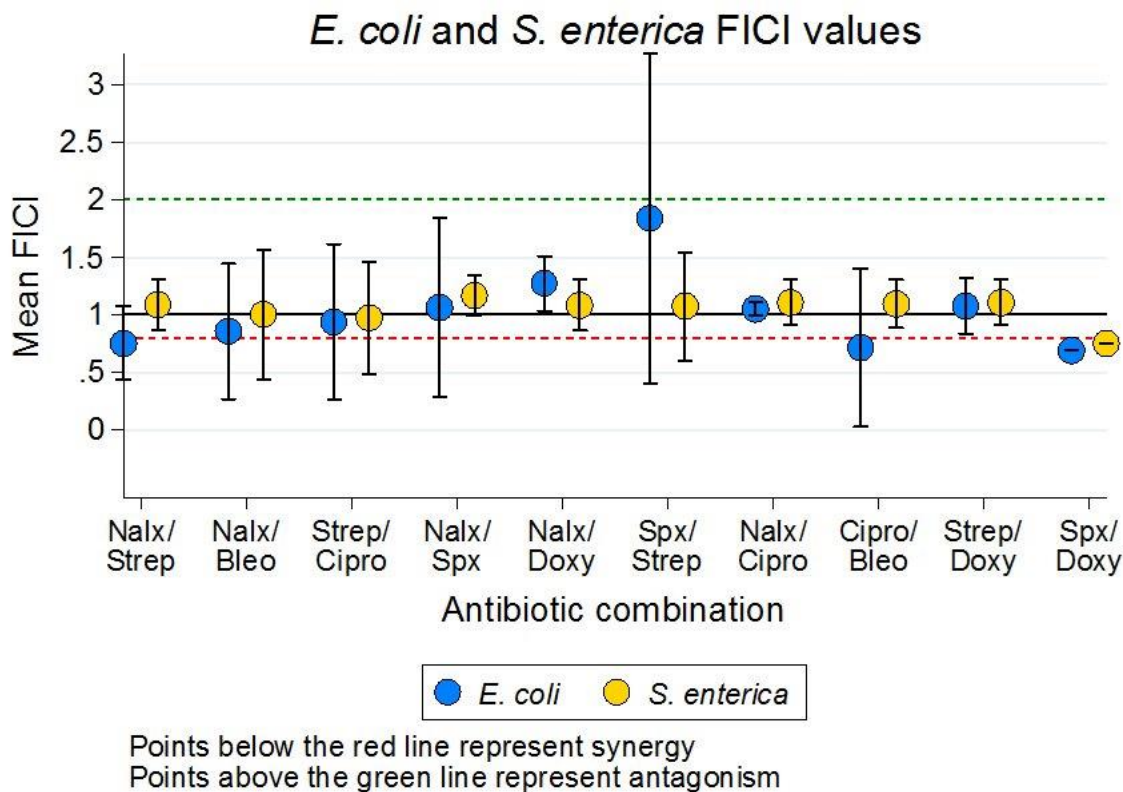

520  
521

522 **Figure 3.** Fractional inhibitory concentration index (FICI) plots of *E. coli* and *S. enterica*  
523 monocultures across ten antibiotic combinations. Each point represents the mean +/-SE of three  
524 replicate FICI values from three biological replicates. FICIs on each plate represent the median  
525 FICI value from the plate. Antibiotic abbreviations: Nalx= nalidixic acid; strep= streptomycin;  
526 bleo= bleomycin; cipro= ciprofloxacin; spx= spectinomycin; doxy= doxycycline.

527

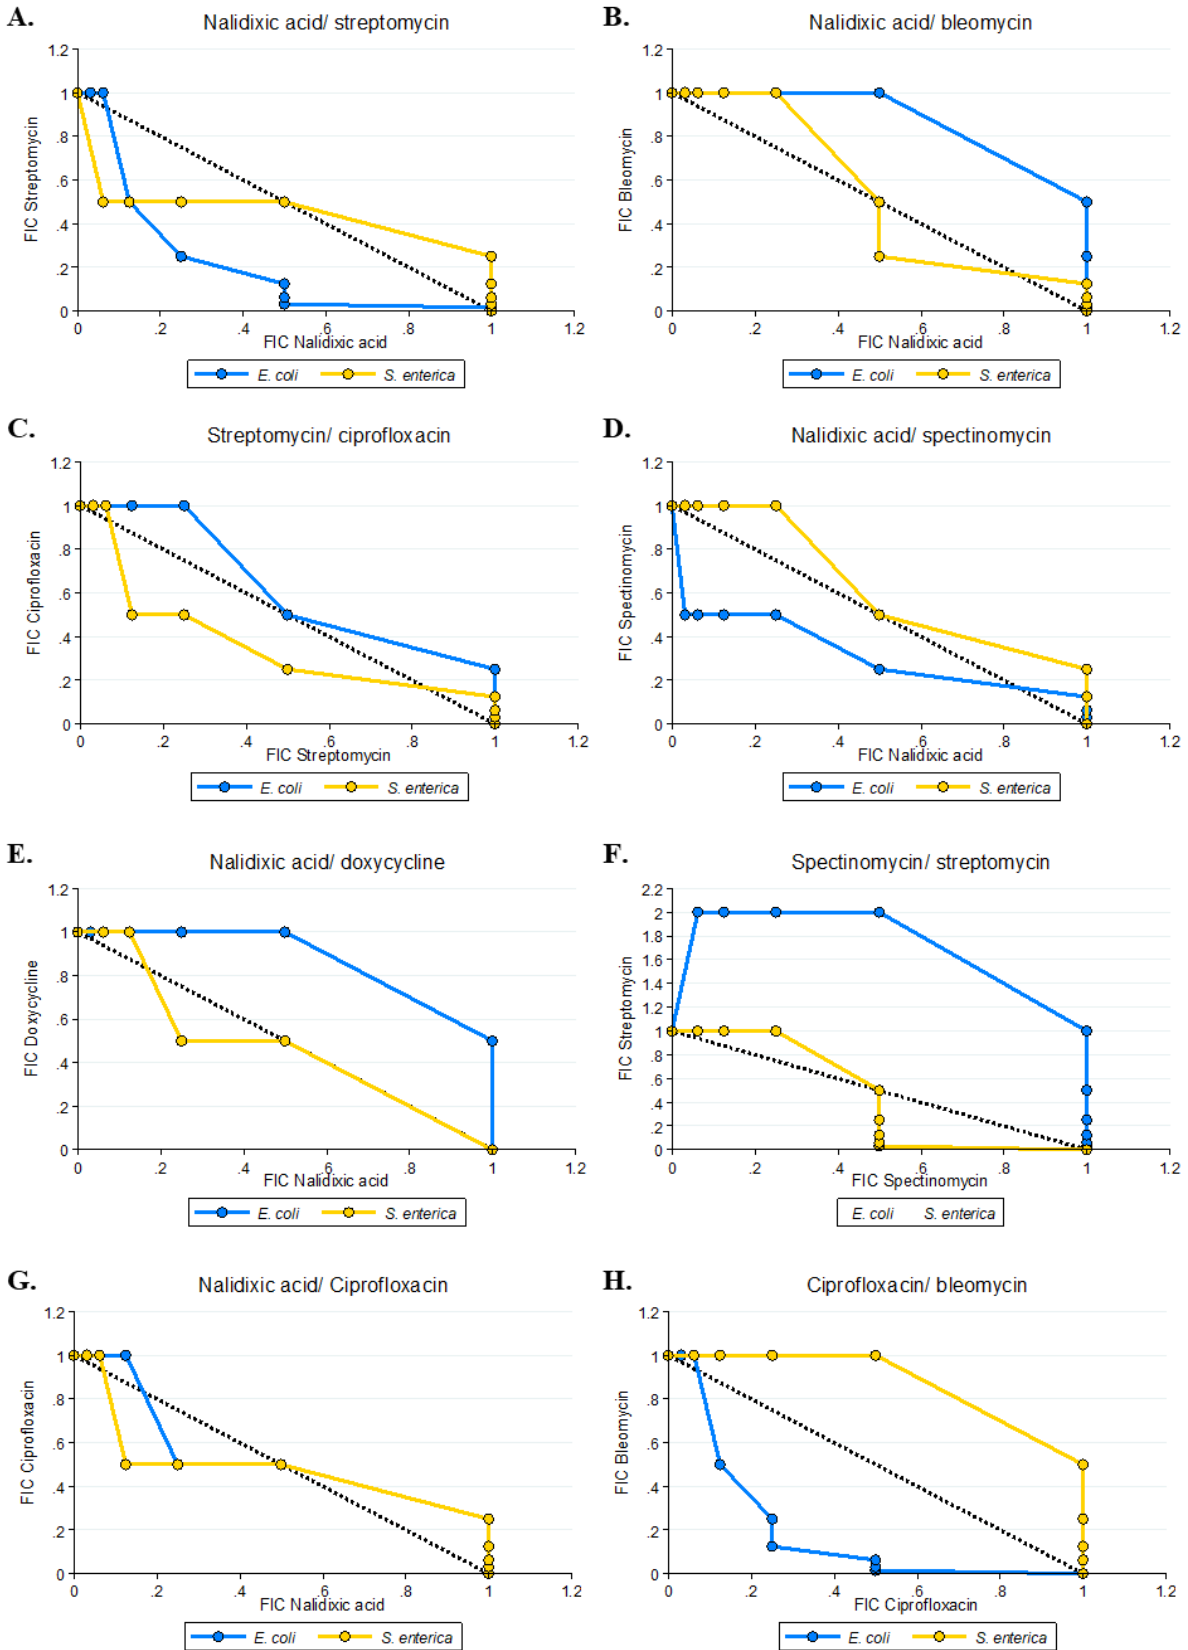



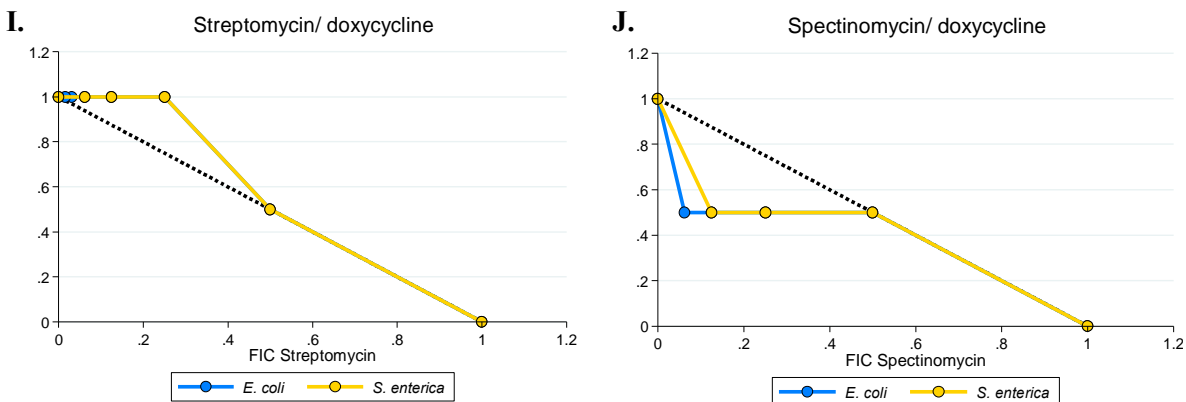

529  
530 **Figure 4.** Representative isobolograms of *E. coli* and *S. enterica* monoculture fractional

531 inhibitory concentrations (FICs) across ten antibiotic combinations. FICs were calculated based  
532 on 48 hours of 30°C growth, and growth was identified as any well which had an OD600 at least  
533 10% of the highest OD600 well on each plate. Each axis corresponds to a fractional inhibitory  
534 concentration (FIC) for the antibiotic pair. The black 1-1 line represent a perfectly independent  
535 interaction; a concave line towards the origin represents a synergistic interaction, and a convex  
536 line away from the origin represents an antagonistic interaction.

537

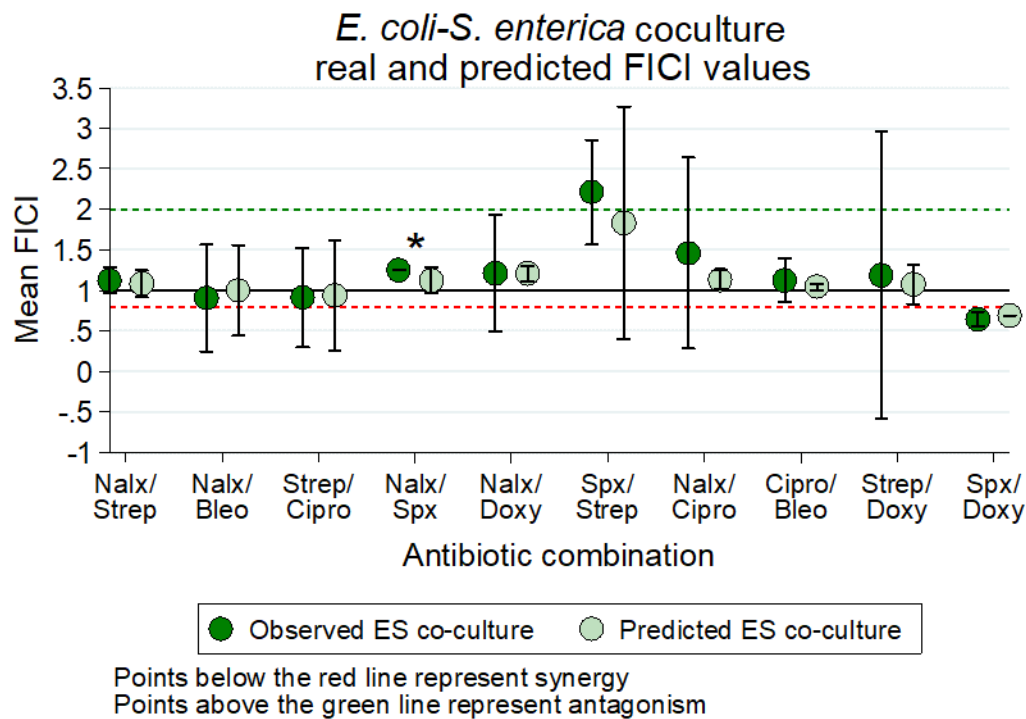

538

539

540 **Figure 5.** Fractional inhibitory concentration index (FICI) plots of predicted and actual co-

541 cultures across ten antibiotic combinations. Each point represents the mean +/-SE of three

542 replicate FICI values from three biological replicates. FICIs on each plate represent the median

543 FICI value from the plate. Asterisks represent  $P < 0.05$  for predicted versus observed ES co-

544 culture FICs were compared with a Mann-Whitney U test.  $P$ -values can be found in

545 **Supplementary table S6.** Antibiotic abbreviations: Nalx= nalidixic acid; strep= streptomycin;

546 bleo= bleomycin; cipro= ciprofloxacin; spx= spectinomycin; doxy= doxycycline.

547

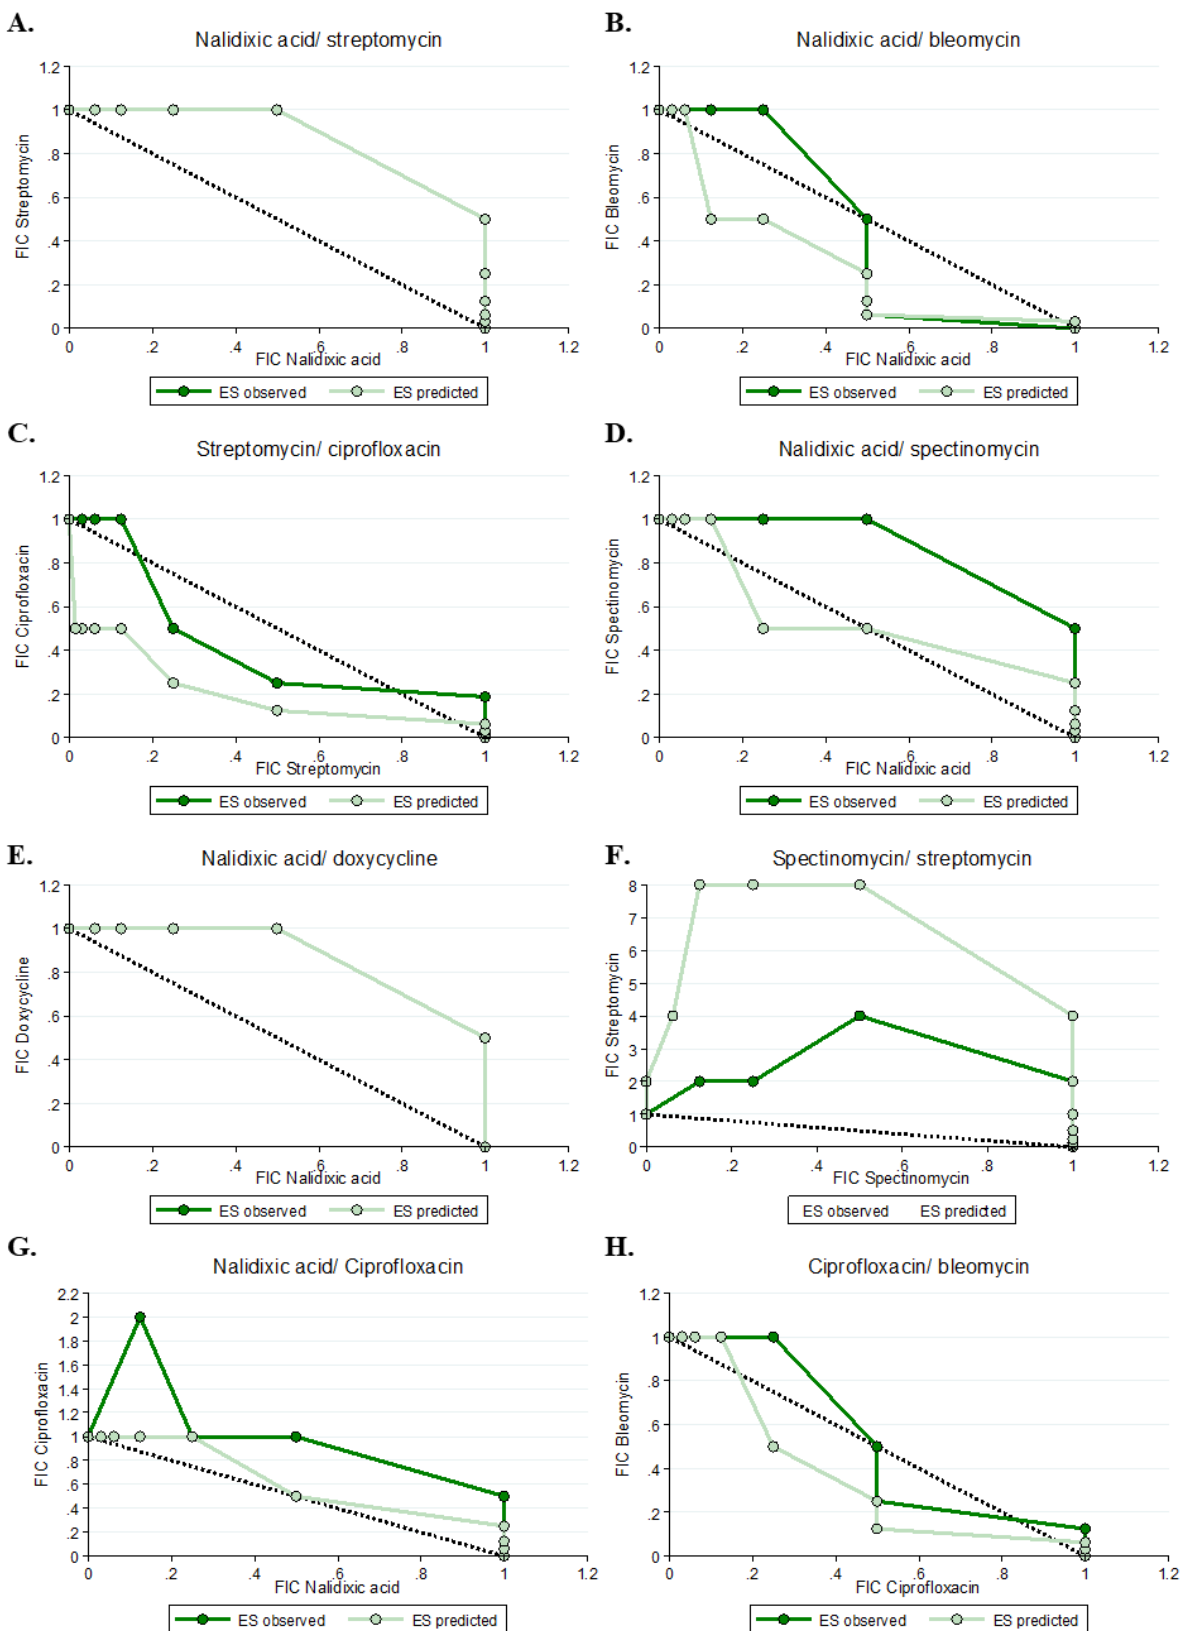

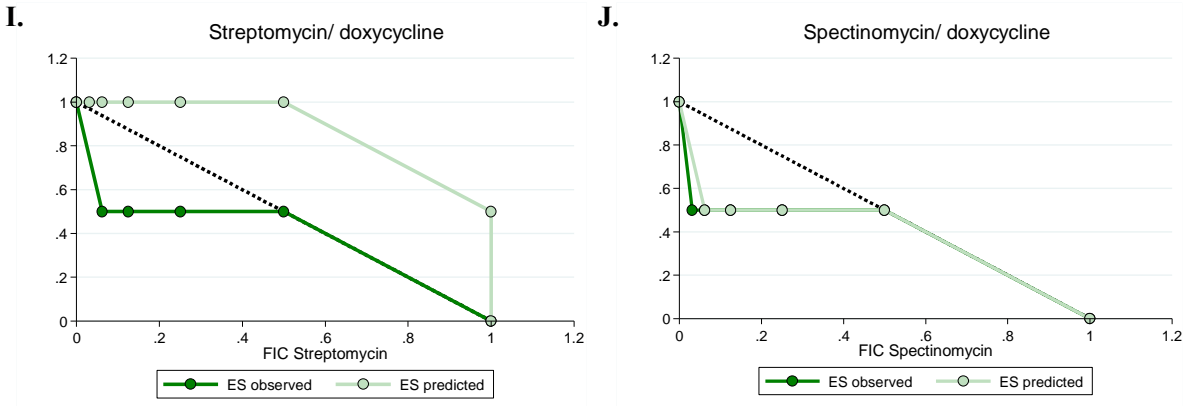

549

550 **Figure 6.** Representative isobolograms of predicted and observed co-culture fractional inhibitory  
551 concentrations (FICs) across ten antibiotic combinations. Predicted FICs were determined based  
552 on monoculture FICs and hypothesized weakest link dynamics (i.e. co-culture growth could only  
553 occur at concentrations of both antibiotics where both species could grow alone). Observed co-  
554 culture FICs were calculated based on 48 hours of 30°C growth, and growth was identified as  
555 any well which had an OD600 at least 10% of the highest OD600 well on each plate.

556

557

558 **Supplementary table S1.** Mechanism of action of antibiotics used in this study.

| <b>Antibiotic</b> | <b>Mechanism</b>                                                 |
|-------------------|------------------------------------------------------------------|
| Bleomycin         | Induces DNA breaks; may inhibit thymidine incorporation into DNA |
| Ciprofloxacin     | Fluoroquinolone: binds DNA gyrase and topoisomerase IV           |
| Nalidixic acid    | Naphthyridone: binds DNA gyrase and topoisomerase IV             |
| Doxycycline       | Binds 30s ribosomal subunit to prevent protein biosynthesis      |
| Spectinomycin     | Binds 30s ribosomal subunit to prevent protein biosynthesis      |
| Streptomycin      | Binds 30s ribosomal subunit to prevent protein biosynthesis      |

559

560

561 **Supplementary table S2.** Median FICIs for *E. coli* and *S. enterica* in monoculture across ten  
 562 antibiotic combinations and three replicates. FICIs for each replicate are the median FICI value  
 563 per plate. FICI values below 0.8 are considered synergy; FICIs between 0.8 and 1 are additive  
 564 interactions, FICIs between 1 and 2 are independent interactions, and FICIs above 2 are  
 565 antagonistic interactions.

| Species            | Antibiotic combination        | Rep 1    | Rep 2     | Rep 3     |
|--------------------|-------------------------------|----------|-----------|-----------|
| <i>E. coli</i>     | Nalidixic acid/ streptomycin  | 0.75     | 0.625     | 0.8828125 |
|                    | Nalidixic acid/ bleomycin     | 0.6875   | 0.75      | 1.125     |
|                    | Streptomycin/ ciprofloxacin   | 1.125    | 0.625     | 1.0625    |
|                    | Nalidixic acid/ spectinomycin | 1.0625   | 0.75      | 1.375     |
|                    | Nalidixic acid/ doxycycline   | 1.25     | 1.1875    | 1.375     |
|                    | Spectinomycin/ streptomycin   | 2.5      | 1.5       | 1.5       |
|                    | Nalidixic acid/ ciprofloxacin | 1.0625   | 1.0234375 | 1.0625    |
|                    | Ciprofloxacin/ bleomycin      | 0.546875 | 0.5625    | 1.03125   |
|                    | Streptomycin/ doxycycline     | 1        | 1.046875  | 1.1875    |
|                    | Spectinomycin/ doxycycline    | 0.6875   | 0.6875    | 0.6875    |
| <i>S. enterica</i> | Nalidixic acid/ streptomycin  | 1.1875   | 1.015625  | 1.0625    |
|                    | Nalidixic acid/ bleomycin     | 1.1875   | 0.75      | 1.0625    |
|                    | Streptomycin/ ciprofloxacin   | 1.125    | 0.75      | 1.03125   |
|                    | Nalidixic acid/ spectinomycin | 1.25     | 1.125     | 1.125     |
|                    | Nalidixic acid/ doxycycline   | 1.03125  | 1.03125   | 1.1875    |
|                    | Spectinomycin/ streptomycin   | 1.25     | 0.875     | 1.09375   |
|                    | Nalidixic acid/ ciprofloxacin | 1.1875   | 1.09375   | 1.03125   |
|                    | Ciprofloxacin/ bleomycin      | 1.1875   | 1.03125   | 1.0625    |
|                    | Streptomycin/ doxycycline     | 1.1875   | 1.09375   | 1.03125   |
|                    | Spectinomycin/ doxycycline    | 0.75     | 0.75      | 0.75      |

566 **Supplementary table S3.** Minimum FICIs for *E. coli* and *S. enterica* in monoculture across ten  
 567 antibiotic combinations and three replicates. FICIs for each replicate are the minimum FICI  
 568 value per plate. FICI values below 0.8 are considered synergy; FICIs between 0.5 and 1 are  
 569 additive interactions, FICIs between 1 and 2 are independent interactions, and FICIs above 2 are  
 570 antagonistic interactions.

| Species            | Antibiotic combination        | Rep 1   | Rep 2    | Rep 3    |
|--------------------|-------------------------------|---------|----------|----------|
| <i>E. coli</i>     | Nalidixic acid/ streptomycin  | 0.5625  | 0.5      | 0.5625   |
|                    | Nalidixic acid/ bleomycin     | 0.5625  | 0.5      | 1.015625 |
|                    | Streptomycin/ ciprofloxacin   | 1       | 0.5      | 1        |
|                    | Nalidixic acid/ spectinomycin | 0.625   | 0.53125  | 1        |
|                    | Nalidixic acid/ doxycycline   | 1.0625  | 1.03125  | 1.0625   |
|                    | Spectinomycin/ streptomycin   | 1.0625  | 1.015625 | 1.015625 |
|                    | Nalidixic acid/ ciprofloxacin | 0.75    | 0.625    | 0.75     |
|                    | Ciprofloxacin/ bleomycin      | 0.375   | 0.375    | 0.5      |
|                    | Streptomycin/ doxycycline     | 0.625   | 1        | 1.03125  |
|                    | Spectinomycin/ doxycycline    | 0.5625  | 0.5625   | 0.5625   |
| <i>S. enterica</i> | Nalidixic acid/ streptomycin  | 1.0625  | 0.5625   | 1        |
|                    | Nalidixic acid/ bleomycin     | 1.0625  | 0.5625   | 0.75     |
|                    | Streptomycin/ ciprofloxacin   | 1       | 0.5625   | 0.625    |
|                    | Nalidixic acid/ spectinomycin | 1.0625  | 1        | 1        |
|                    | Nalidixic acid/ doxycycline   | 0.75    | 0.75     | 1.03125  |
|                    | Spectinomycin/ streptomycin   | 1       | 0.53125  | 1        |
|                    | Nalidixic acid/ ciprofloxacin | 1.0625  | 1        | 0.625    |
|                    | Ciprofloxacin/ bleomycin      | 1.0625  | 0.625    | 0.75     |
|                    | Streptomycin/ doxycycline     | 1.03125 | 1        | 0.75     |
|                    | Spectinomycin/ doxycycline    | 0.625   | 0.625    | 0.625    |

571

572 **A.**

| <i>E. coli</i> | 0 | 6.25 | 12.5 | 25 | 50 | 100 | 200 | 400 |
|----------------|---|------|------|----|----|-----|-----|-----|
| 0              |   |      |      |    |    |     |     |     |
| 2              |   |      |      |    |    |     |     |     |
| 4              |   |      |      |    |    |     |     |     |
| 8              |   |      |      |    |    |     |     |     |
| 16             |   |      |      |    |    |     |     |     |
| 32             |   |      |      |    |    |     |     |     |
| 64             |   |      |      |    |    |     |     |     |
| 128            |   |      |      |    |    |     |     |     |

573

574

575

576

577

578 **B.**

| <i>S. enterica</i> | 0 | 62.5 | 125 | 250 | 500 | 1000 | 2000 | 4000 |
|--------------------|---|------|-----|-----|-----|------|------|------|
| 0                  |   |      |     |     |     |      |      |      |
| 0.25               |   |      |     |     |     |      |      |      |
| 0.5                |   |      |     |     |     |      |      |      |
| 1                  |   |      |     |     |     |      |      |      |
| 2                  |   |      |     |     |     |      |      |      |
| 4                  |   |      |     |     |     |      |      |      |
| 8                  |   |      |     |     |     |      |      |      |
| 16                 |   |      |     |     |     |      |      |      |

579

580

581

582

583

584

585

586

587



588

589 **C.**

| ES (predicted) | 0 | 6.25 | 12.5 | 25 | 50 | 100 | 200 | 400 |
|----------------|---|------|------|----|----|-----|-----|-----|
| 0              |   |      |      |    |    |     |     |     |
| 0.25           |   |      |      |    |    |     |     |     |
| 0.5            |   |      |      |    |    |     |     |     |
| 1              |   |      |      |    |    |     |     |     |
| 2              |   |      |      |    |    |     |     |     |
| 4              |   |      |      |    |    |     |     |     |
| 8              |   |      |      |    |    |     |     |     |
| 16             |   |      |      |    |    |     |     |     |

594

595 **D.**

| ES (observed) | 0 | 6.25 | 12.5 | 25 | 50 | 100 | 200 | 400 |
|---------------|---|------|------|----|----|-----|-----|-----|
| 0             |   |      |      |    |    |     |     |     |
| 0.25          |   |      |      |    |    |     |     |     |
| 0.5           |   |      |      |    |    |     |     |     |
| 1             |   |      |      |    |    |     |     |     |
| 2             |   |      |      |    |    |     |     |     |
| 4             |   |      |      |    |    |     |     |     |
| 8             |   |      |      |    |    |     |     |     |
| 16            |   |      |      |    |    |     |     |     |

600

601 **Supplementary figure S1.** Example of developing predicted FICIs from replicate 1 of nalidixic  
 602 acid/ spectinomycin combination. Growth patterns of *E. coli* (A) and *S. enterica* (B)  
 603 monocultures were used to predict growth patterns for the co-culture (C). FICIs and  
 604 isobolograms were developed from this predicted data as previously described, and these were  
 605 compared to real data obtained from co-cultures (D).

606 **Supplementary table S4.4** Minimum inhibitory concentrations (MICs) of each species in each  
607 antibiotic, predictions for co-cultures based on weakest link, and actual co-culture MICs. MICs  
608 were defined as the lowest concentration of antibiotic required to inhibit growth below 10% of  
609 the densest well (by OD600) within a plate. Medians and ranges are displayed. Predicted co-  
610 culture MICs are based on weakest link hypothesis (i.e. the co-culture will be limited by the least  
611 resistant monoculture).

| <b>Antibiotic</b>      | <b><i>E. coli</i> MIC</b> | <b><i>S. enterica</i> MIC</b> | <b>Predicted co-culture MIC</b> | <b>Observed co-culture MIC</b> |
|------------------------|---------------------------|-------------------------------|---------------------------------|--------------------------------|
| Bleomycin (µg/mL)      | 8 (2-8)                   | 2 (1-2)                       | 2 (1-2)                         | 1 (0.5-2)                      |
| Ciprofloxacin (ng/mL)  | 16 (8-32)                 | 16 (16-32)                    | 16 (8-32)                       | 16 (8-16)                      |
| Doxycycline (µg/mL)    | 0.25 (0.0625-0.25)        | 2.5 (2.5-5)                   | 0.25 (0.0625-0.25)              | 0.25 (0.125-0.25)              |
| Nalidixic acid (µg/mL) | 32 (32-64)                | 8 (4-8)                       | 8 (4-8)                         | 2 (1-4)                        |
| Spectinomycin (µg/mL)  | 100 (100-200)             | 500 (500-1000)                | 100 (100-200)                   | 100 (50-200)                   |
| Streptomycin (µg/mL)   | 1.5 (0.5-2)               | 160 (80-160)                  | 1.5 (0.5-2)                     | 0.5 (0.5-8)                    |

612

613 **Supplementary table S5.** Observed fractional inhibitory concentration indices (FICIs) for each  
614 antibiotic combination in monoculture and co-culture, and predicted co-culture FICIs based on  
615 weakest link. FICIs are median values from three biological replicates each. Red cells represent  
616 synergistic interactions (median FICI<0.8); green cells represent antagonistic interactions  
617 (median FICI>2).

| Antibiotic combination           | <i>E. coli</i><br>FICI | <i>S. enterica</i><br>FICI | Predicted co-culture<br>FICI | Observed co-culture<br>FICI |
|----------------------------------|------------------------|----------------------------|------------------------------|-----------------------------|
| Nalidixic acid/<br>streptomycin  | 0.75                   | 1.06                       | 1.13                         | 1.13                        |
| Nalidixic acid/<br>bleomycin     | 0.75                   | 1.06                       | 1.06                         | 0.88                        |
| Streptomycin/<br>ciprofloxacin   | 1.06                   | 1.03                       | 1.06                         | 1.05                        |
| Nalidixic acid/<br>spectinomycin | 1.06                   | 1.13                       | 1.13                         | 1.25                        |
| Nalidixic acid/<br>doxycycline   | 1.25                   | 1.03                       | 1.19                         | 1.38                        |
| Spectinomycin/<br>streptomycin   | 1.50                   | 1.09                       | 1.50                         | 2.13                        |
| Nalidixic acid/<br>ciprofloxacin | 1.06                   | 1.09                       | 1.13                         | 1.25                        |
| Ciprofloxacin/<br>bleomycin      | 0.56                   | 1.06                       | 1.05                         | 1.06                        |
| Streptomycin/<br>doxycycline     | 1.05                   | 1.09                       | 1.05                         | 0.88                        |
| Spectinomycin/<br>doxycycline    | 0.69                   | 0.75                       | 0.69                         | 0.63                        |

618

619

620 **Supplementary table S6.** Mann-Whitney U statistical test results for predicted vs. observed

621 FICI results.

| Antibiotic combination        | <i>P</i> -value for predicted vs. observed FICI |
|-------------------------------|-------------------------------------------------|
| Nalidixic acid/ streptomycin  | 0.49                                            |
| Nalidixic acid/ bleomycin     | 0.66                                            |
| Streptomycin/ ciprofloxacin   | 0.50                                            |
| Nalidixic acid/ spectinomycin | 0.037                                           |
| Nalidixic acid/ doxycycline   | 0.50                                            |
| Spectinomycin/ streptomycin   | 0.37                                            |
| Nalidixic acid/ ciprofloxacin | 0.18                                            |
| Ciprofloxacin/ bleomycin      | 0.10                                            |
| Streptomycin/ doxycycline     | 0.51                                            |
| Spectinomycin/ doxycycline    | 0.11                                            |

622

623

624

625
